# Supplementary material for: Kurarinone Inhibits HCoV-OC43 Infection by Impairing the Virus-Induced Autophagic Flux in MRC-5 Human Lung Cells
Source: MDPI journal article supplement (doi:10.3390/jcm9072230), 2020-07-14
Supplement: s1 [file s1]

# Supplementary Fig.1

A.

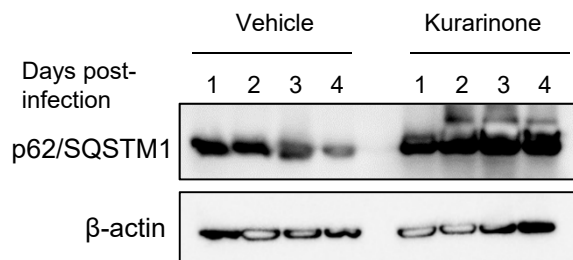

B.

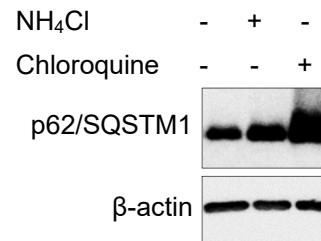

**Supplementary Figure 1.** Expression of p62/SQSTM1 protein in response to administration of kurarinone and autophagy inhibitor (NH<sub>4</sub>Cl and Chloroquine). (A) HCoV-OC43-infected MRC-5 cells were treated with kurarinone or vehicle for 4 days; Western blot was performed with anti-p62/SQSTM1. (B) MRC-5 cells treated with 5 mM NH<sub>4</sub>Cl or 10  $\mu$ M Chloroquine for 2 days were harvested and cell lysates were analyzed by Western blot.
